# Supplementary material for: Metachromatic leukodystrophy genotypes in The Netherlands reveal novel pathogenic ARSA variants in non-Caucasian patients
Source: PubMed Central journal article supplement (PMC7476914; doi:10.1007/s10048-020-00621-6), 2020-07-07
Supplement: 10048_2020_621_MOESM1_ESM.pdf [file 10048_2020_621_MOESM1_ESM.pdf]

**Supplementary Table 1: Overview of individual patient characteristics of all included patients**

| Patient       | Ethnicity        | cDNA variant 1  | Amino acid change     | cDNA variant 2 | Amino acid change | Number of Pd alleles | Type           | ASA activity (used reference values) | ASA activity expressed as percentage of reference mean | ASA activity expressed as percentage of lowest reference boundary | ASA activity expressed in s.d. |
|---------------|------------------|-----------------|-----------------------|----------------|-------------------|----------------------|----------------|--------------------------------------|--------------------------------------------------------|-------------------------------------------------------------------|--------------------------------|
| <b>MLD-1</b>  | Western European | c.257G>A        | p.(Arg86Gln)          | c.293C>T       | p.(Ser98Phe)      | 1                    | Adult          | Very low                             | NA                                                     | NA                                                                | NA                             |
| <b>MLD-2</b>  | Western European | c.257G>A        | p.(Arg86Gln)          | c.293C>T       | p.(Ser98Phe)      | 1                    | Adult          | 4.8 nmol/h/mg (ref: 81 – 333)        | 2.3                                                    | 5.9                                                               | -3.4                           |
| <b>MLD-4</b>  | Western European | c.251C>T        | p.(Pro84Leu)          | c.1150G>A      | p.(Glu384Lys)     | 0                    | Early-juvenile | 32.0 nmol/h/mg (ref: 55 – 285)       | 18.8                                                   | 58.2                                                              | -4.2                           |
| <b>MLD-5</b>  | Western European | c.465+1G>A      | r.0                   | c.1283C>T      | p.(Pro428Leu)     | 0                    | Early-juvenile | 9.8 nmol/h/mg (ref: 81 – 300)        | 5.1                                                    | 12.1                                                              | -3.3                           |
| <b>MLD-6</b>  | Western European | c.465+1G>A      | r.0                   | c.1283C>T      | p.(Pro428Leu)     | 0                    | Late-juvenile  | 10.4 nmol/h/mg (ref: 81 – 300)       | 5.5                                                    | 12.8                                                              | -3.3                           |
| <b>MLD-8</b>  | Western European | c.418_419insC   | p.(His140fs)          | c.640G>C       | p.(Ala214Pro)     | 0                    | Late-infantile | 8.6 nmol/h/mg (ref: 81 – 333)        | 4.2                                                    | 10.6                                                              | -3.4                           |
| <b>MLD-9</b>  | Western European | c.1283C>T       | p.(Pro428Leu)         | c.1283C>T      | p.(Pro428Leu)     | 0                    | Late-juvenile  | 12.0 nmol/17h/mg (ref: 70 – 120)     | 12.6                                                   | 17.1                                                              | -3.3                           |
| <b>MLD-12</b> | Western European | c.640G>C        | p.(Ala214Pro)         | c.1283C>T      | p.(Pro428Leu)     | 0                    | Early-juvenile | 6.0 nmol/h/mg (ref: 35 – 110)        | 8.3                                                    | 17.1                                                              | -2.7                           |
| <b>MLD-13</b> | Western European | c.1283C>T       | p.(Pro428Leu)         | c.1283C>T      | p.(Pro428Leu)     | 0                    | Adult          | 7.0 nmol/h/mg (ref: 35 – 110)        | 9.6                                                    | 20.0                                                              | -2.6                           |
| <b>MLD-14</b> | Western European | c.1283C>T       | p.(Pro428Leu)         | c.1283C>T      | p.(Pro428Leu)     | 0                    | Late-juvenile  | 6.0 nmol/h/mg (ref: 30 – 90)         | 10.0                                                   | 20.0                                                              | -2.6                           |
| <b>MLD-15</b> | Western European | c.257G>A        | p.(Arg86Gln)          | c.293C>T       | p.(Ser98Phe)      | 1                    | Adult          | 6.0 nmol/17h/mg (ref: 45 – 260)      | 3.9                                                    | 13.3                                                              | -3.3                           |
| <b>MLD-16</b> | Western European | c.465+1G>A      | r.0                   | c.542T>G       | p.(Ile181Ser)     | 0                    | Late-juvenile  | 6.0 nmol/17h/mg (ref: 45 – 260)      | 3.9                                                    | 13.3                                                              | -3.3                           |
| <b>MLD-17</b> | Western European | c.1223_1231del9 | p.(Ser408_Thr410 del) | c.1283C>T      | p.(Pro428Leu)     | 1                    | Early-juvenile | 9.0 nmol/h/mg (ref: 30 – 90)         | 15.0                                                   | 30.0                                                              | -2.4                           |
| <b>MLD-18</b> | Western European | c.1223_1231del9 | p.(Ser408_Thr410 del) | c.1283C>T      | p.(Pro428Leu)     | 1                    | Early-juvenile | 10.0 nmol/h/mg (ref: 30 – 90)        | 16.7                                                   | 33.3                                                              | -2.4                           |
| <b>MLD-21</b> | Western European | c.641C>T        | p.(Ala214Val)         | c.1283C>T      | p.(Pro428Leu)     | 0                    | Late-juvenile  | 0.1 nmol/h/mg (ref: 9 – 30)          | 0.5                                                    | 1.1                                                               | NA                             |
| <b>MLD-22</b> | Western European | c.641C>T        | p.(Ala214Val)         | c.1283C>T      | p.(Pro428Leu)     | 0                    | Late-juvenile  | 0.1 nmol/h/mg (ref: 9 – 30)          | 0.5                                                    | 1.1                                                               | NA                             |
| <b>MLD-23</b> | Western European | c.1283C>T       | p.(Pro428Leu)         | Unknown        | Unknown           | 0                    | Early-juvenile | 10.0 nmol/17h/mg (ref: 70 – 210)     | 7.1                                                    | 14.3                                                              | NA                             |
| <b>MLD-24</b> | Western European | c.1283C>T       | p.(Pro428Leu)         | Unknown        | Unknown           | 0                    | Early-juvenile | 10.0 nmol/17h/mg (ref: 70 – 210)     | 7.1                                                    | 14.3                                                              | NA                             |
| <b>MLD-25</b> | South Asian      | c.1200C>T       | p.(=)                 | c.1200C>T      | p.(=)             | 2                    | Late-juvenile  | 3.3 nmol/h/mg (ref: 35 – 110)        | 4.6                                                    | 9.4                                                               | -2.8                           |
| <b>MLD-26</b> | Western European | c.700C>T        | p.(Gln234*)           | c.847G>T       | p.(Asp283Tyr)     | 1                    | Late-infantile | 2.4 nmol/h/mg (ref: 35 – 110)        | 3.3                                                    | 6.9                                                               | -2.8                           |

|               |                  |                     |                    |                     |               |   |                |                                     |      |      |      |
|---------------|------------------|---------------------|--------------------|---------------------|---------------|---|----------------|-------------------------------------|------|------|------|
| <b>MLD-27</b> | Western European | c.257G>A            | p.(Arg86Gln)       | c.293C>T            | p.(Ser98Phe)  | 1 | Late-juvenile  | 11.0 nmol/17h/mg<br>(ref: 70 – 210) | 7.9  | 15.7 | NA   |
| <b>MLD-29</b> | Western European | c.1378C>T           | p.(Gln460*)        | c.1283C>T           | p.(Pro428Leu) | 0 | Late-juvenile  | 3.0 nmol/h/mg<br>(ref: 30 – 90)     | 5.0  | 10.0 | -2.7 |
| <b>MLD-30</b> | Western European | c.1283C>T           | p.(Pro428Leu)      | c.1283C>T           | p.(Pro428Leu) | 0 | Adult          | Very low                            | NA   | NA   | NA   |
| <b>MLD-31</b> | Western European | c.1283C>T           | p.(Pro428Leu)      | c.1283C>T           | p.(Pro428Leu) | 0 | Adult          | Very low                            | NA   | NA   | NA   |
| <b>MLD-32</b> | Western European | c.542T>G            | p.(Ile181Ser)      | c.1177A>G           | p.(Thr393Gly) | 0 | Adult          | 5.0 nmol/17h/mg<br>(ref: 45 – 260)  | 3.3  | 11.1 | -3.3 |
| <b>MLD-34</b> | North African    | c.545C>G            | p.(Pro182Arg)      | c.545C>G            | p.(Pro182Arg) | 2 | Late-infantile | 7.0 nmol/h/mg<br>(ref: 30 – 90)     | 11.7 | 23.3 | -2.5 |
| <b>MLD-35</b> | Western European | c.1283C>T           | p.(Pro428Leu)      | c.1283C>T           | p.(Pro428Leu) | 0 | Late-juvenile  | Very low                            | NA   | NA   | NA   |
| <b>MLD-36</b> | Western European | c.1283C>T           | p.(Pro428Leu)      | c.1079T>C           | p.(Leu360Pro) | 0 | Early-juvenile | 4.0 nmol/h/mg<br>(ref: 35 – 110)    | 5.5  | 11.4 | -2.7 |
| <b>MLD-37</b> | Western European | c.1283C>T           | p.(Pro428Leu)      | c.1079T>C           | p.(Leu360Pro) | 0 | Early-juvenile | 3.0 nmol/h/mg<br>(ref: 35 – 110)    | 4.1  | 8.6  | -2.8 |
| <b>MLD-38</b> | Western European | c.582dup            | p.(Trp195Leufs*15) | c.1283C>T           | p.(Pro428Leu) | 0 | Early-juvenile | 16.2 nmol/17h/mg<br>(ref: 81 – 300) | 8.5  | 20.0 | -3.2 |
| <b>MLD-39</b> | Western European | c.465+1G>A          | r.0                | c.1283C>T           | p.(Pro428Leu) | 0 | Early-juvenile | 6.8 nmol/h/mg<br>(ref: 30 – 90)     | 11.3 | 22.7 | -2.5 |
| <b>MLD-40</b> | Western European | c.251C>T            | p.(Pro84Leu)       | c.293C>T            | p.(Ser98Phe)  | 1 | Late-infantile | 5.0 nmol/h/mg<br>(ref: 58 – 170)    | 4.4  | 8.6  | -5.5 |
| <b>MLD-41</b> | Western European | c.465+1G>A          | r.0                | c.542T>G            | p.(Ile181Ser) | 0 | Adult          | Very low                            | NA   | NA   | -5.5 |
| <b>MLD-44</b> | Western European | c.1283C>T           | p.(Pro428Leu)      | c.1283C>T           | p.(Pro428Leu) | 0 | Adult          | 4.0 nmol/h/mg<br>(ref: 35 – 110)    | 5.5  | 11.4 | -2.7 |
| <b>MLD-45</b> | Western European | c.465+1G>A          | r.0                | c.836_837delTCinsAA | p.(Ile279Lys) | 0 | Late-infantile | 4.0 nmol/17h/mg<br>(ref: 81 – 262)  | 2.3  | 4.9  | -5.5 |
| <b>MLD-46</b> | Western European | c.1283C>T           | p.(Pro428Leu)      | c.1283C>T           | p.(Pro428Leu) | 0 | Late-juvenile  | 5.0 nmol/17h/mg<br>(ref: missing)   | NA   | NA   | NA   |
| <b>MLD-48</b> | Western European | c.1195C>T           | p.(His399Tyr)      | c.1283C>T           | p.(Pro428Leu) | 0 | Adult          | 8.0 nmol/h/mg<br>(ref: 35 – 110)    | 11.0 | 22.9 | -2.6 |
| <b>MLD-49</b> | Western European | c.1195C>T           | p.(His399Tyr)      | c.1283C>T           | p.(Pro428Leu) | 0 | Adult          | 8.0 nmol/h/mg<br>(ref: 35 – 110)    | 11.0 | 22.9 | -2.6 |
| <b>MLD-50</b> | Western European | c.251C>T            | p.(Pro84Leu)       | c.1174C>T           | p.(Arg392Trp) | 0 | Late-infantile | Undetectable<br>(ref: 30 – 90)      | 0.0  | 0.0  | -2.9 |
| <b>MLD-51</b> | Western European | c.1283C>T           | p.(Pro428Leu)      | c.1283C>T           | p.(Pro428Leu) | 0 | Adult          | 12.0 nmol/h/mg<br>(ref: 81 – 333)   | 5.8  | 14.8 | -3.3 |
| <b>MLD-53</b> | Western European | c.836_837delTCinsAA | p.(Ile279Lys)      | c.1283C>T           | p.(Pro428Leu) | 0 | Early-juvenile | 1.0 nmol/h/mg<br>(ref: 81 – 262)    | 0.6  | 1.2  | -5.7 |
| <b>MLD-54</b> | Western European | c.1283C>T           | p.(Pro428Leu)      | c.1283C>T           | p.(Pro428Leu) | 0 | Late-juvenile  | Very low                            | NA   | NA   | NA   |
| <b>MLD-55</b> | Western European | c.1283C>T           | p.(Pro428Leu)      | c.1283C>T           | p.(Pro428Leu) | 0 | Adult          | 6.0 nmol/h/mg<br>(ref: 35 – 110)    | 8.3  | 17.1 | -2.7 |
| <b>MLD-56</b> | Western European | c.577C>A            | p.(Pro193Leu)      | c.1283C>T           | p.(Pro428Leu) | 0 | Adult          | 15.0 nmol/h/mg<br>(ref: 58 – 170)   | 13.2 | 25.9 | -5.0 |

|               |                  |                |                    |                |                    |   |                |                                    |      |      |      |
|---------------|------------------|----------------|--------------------|----------------|--------------------|---|----------------|------------------------------------|------|------|------|
| <b>MLD-57</b> | Western Asian    | c.1123_1126del | p.(Leu375Serfs*47) | c.1123_1126del | p.(Leu375Serfs*47) | 0 | Late-infantile | 0.4 nmol/17h/mg<br>(ref: 45 – 260) | 0.3  | 0.9  | -3.4 |
| <b>MLD-58</b> | Western European | c.1283C>T      | p.(Pro428Leu)      | c.1283C>T      | p.(Pro428Leu)      | 0 | Late-juvenile  | 6.7 nmol/h/mg<br>(ref: 30 – 90)    | 11.2 | 22.3 | -2.5 |
| <b>MLD-59</b> | Western European | c.465+1G>A     | r.0                | c.465+1G>A     | r.0                | 0 | Late-infantile | 10.1 nmol/h/mg<br>(ref: 81 – 300)  | 5.3  | 12.5 | -3.3 |
| <b>MLD-60</b> | Western European | c.257G>A       | p.(Arg86Gln)       | c.293C>T       | p.(Ser98Phe)       | 0 | Late-juvenile  | 6.0 nmol/17h/mg<br>(ref: 45 – 260) | 3.9  | 13.3 | -3.3 |
| <b>MLD-61</b> | Western European | c.1283C>T      | p.(Pro428Leu)      | c.1283C>T      | p.(Pro428Leu)      | 0 | Late-juvenile  | 7.0 nmol/h/mg<br>(ref: 30 – 90)    | 11.7 | 23.3 | -2.5 |
| <b>MLD-62</b> | Western European | c.1283C>T      | p.(Pro428Leu)      | c.1283C>T      | p.(Pro428Leu)      | 0 | Adult          | 6.0 nmol/17h/mg<br>(ref: 45 – 260) | 3.9  | 13.3 | -3.3 |
| <b>MLD-63</b> | Western European | c.1283C>T      | p.(Pro428Leu)      | c.1283C>T      | p.(Pro428Leu)      | 0 | Late-juvenile  | Very low                           | NA   | NA   | NA   |
| <b>MLD-64</b> | Western European | c.1136C>T      | p.(Pro379Leu)      | c.1283C>T      | p.(Pro428Leu)      | 0 | Late-juvenile  | 8.0 nmol/17h/mg<br>(ref: 45 – 260) | 5.3  | 17.8 | -3.4 |
| <b>MLD-65</b> | Western European | c.1136C>T      | p.(Pro379Leu)      | c.1283C>T      | p.(Pro428Leu)      | 0 | Late-juvenile  | 6.0 nmol/17h/mg<br>(ref: 45 – 260) | 3.9  | 13.3 | -3.3 |
| <b>MLD-66</b> | Western European | c.1283C>T      | p.(Pro428Leu)      | c.1007T>C      | p.(Leu336Pro)      | 0 | Early-juvenile | 6.8 nmol/h/mg<br>(ref: 30 – 90)    | 11.3 | 22.7 | -2.5 |
| <b>MLD-67</b> | Western European | c.577C>A       | p.(Pro193Leu)      | c.293C>T       | p.(Ser98Phe)       | 0 | Late-juvenile  | 2.9 nmol/17h/mg<br>(ref: 45 – 260) | 1.9  | 6.4  | -3.3 |
| <b>MLD-68</b> | Western European | c.1283C>T      | p.(Pro428Leu)      | c.1283C>T      | p.(Pro428Leu)      | 0 | Late-juvenile  | 15.0 nmol/17h/mg<br>(ref: missing) | NA   | NA   | NA   |
| <b>MLD-69</b> | Eastern African  | c.371G>A       | p.(Gly124Asp)      | c.929G>T       | p.(Gly310Val)      | 0 | Late-infantile | Undetectable<br>(ref: 45 – 260)    | 0.0  | 0.0  | -3.4 |
| <b>MLD-70</b> | Eastern African  | c.371G>A       | p.(Gly124Asp)      | c.929G>T       | p.(Gly310Val)      | 0 | Late-infantile | Undetectable<br>(ref: 45 – 260)    | 0.0  | 0.0  | -3.4 |
| <b>MLD-71</b> | Western European | c.736C>T       | p.(Arg246Cys)      | c.1283C>T      | p.(Pro428Leu)      | 0 | Late-juvenile  | Very low                           | NA   | NA   | NA   |
| <b>MLD-72</b> | Western European | c.465+1G>A     | r.0                | c.1283C>T      | p.(Pro428Leu)      | 0 | Late-juvenile  | 4.0 nmol/17h/mg<br>(ref: 45 – 260) | 2.6  | 8.9  | -3.3 |
| <b>MLD-73</b> | Western European | c.465+1G>A     | r.0                | c.1283C>T      | p.(Pro428Leu)      | 0 | Early-juvenile | 3.0 nmol/17h/mg<br>(ref: 45 – 260) | 2.0  | 6.7  | -3.3 |
| <b>MLD-74</b> | Western European | c.1283C>T      | p.(Pro428Leu)      | c.1283C>T      | p.(Pro428Leu)      | 0 | Adult          | 5.8 nmol/17h/mg<br>(ref: 45 – 260) | 3.8  | 12.9 | -3.3 |
| <b>MLD-76</b> | Western European | c.641C>T       | p.(Ala214Val)      | c.1283C>T      | p.(Pro428Leu)      | 0 | Late-juvenile  | 6.0 nmol/17h/mg<br>(ref: 45 – 260) | 3.9  | 13.3 | -3.3 |
| <b>MLD-80</b> | Western European | c.257G>A       | p.(Arg86Gln)       | c.293C>T       | p.(Ser98Phe)       | 0 | Late-juvenile  | 3.3 nmol/17h/mg<br>(ref: 45 – 260) | 2.2  | 7.3  | -3.3 |
| <b>MLD-81</b> | Western European | c.257G>A       | p.(Arg86Gln)       | c.1283C>T      | p.(Pro428Leu)      | 0 | Adult          | 4.0 nmol/17h/mg<br>(ref: 45 – 260) | 2.6  | 8.9  | -3.3 |
| <b>MLD-82</b> | Western Asian    | c.905G>A       | p.(Cys302Tyr)      | c.905G>A       | p.(Cys302Tyr)      | 0 | Late-infantile | 3.0 nmol/h/mg<br>(ref: 30 – 90)    | 5.3  | 10.7 | -2.7 |

Abbreviations in table: fs = frameshift, del = deletion, \* = stop codon, Pd = pseudodeficiency, ASA = arylsulfatase A, nmol/h/mg = nanomole/hour/milligram protein, NA = not applicable, ref = reference values used in analysis

**Supplementary Table 2: Original and reference-corrected means of ASA activity per MLD phenotype**

| <b>MLD phenotype<br/>(patient number)</b> | <b>Mean of original values given<br/>for ASA activity levels (s.d.)</b> | <b>Mean ASA activity expressed as<br/>percentage of reference mean (s.d.)</b> | <b>Mean ASA activity expressed as percentage<br/>of lowest reference boundary (s.d.)</b> | <b>Mean ASA activity expressed in s.d. of the<br/>mean of reference values (s.d.)</b> |
|-------------------------------------------|-------------------------------------------------------------------------|-------------------------------------------------------------------------------|------------------------------------------------------------------------------------------|---------------------------------------------------------------------------------------|
| <b>Late-infantile (11)</b>                | 3.7 (3.6)                                                               | 3.3 (3.5)                                                                     | 7.1 (7.2)                                                                                | -3.5 (1.0)                                                                            |
| <b>Early-juvenile (14)</b>                | 9.1 (7.7)                                                               | 8.7 (5.4)                                                                     | 19.5 (14.2)                                                                              | -3.1 (0.9)                                                                            |
| <b>Late-juvenile (18)</b>                 | 5.7 (3.4)                                                               | 5.4 (3.8)                                                                     | 12.6 (6.3)                                                                               | -3.1 (0.3)                                                                            |
| <b>Adult (13)</b>                         | 7.0 (3.2)                                                               | 6.5 (3.7)                                                                     | 15.4 (6.0)                                                                               | -3.2 (0.6)                                                                            |

Abbreviations in table: ASA = arylsulfatase A, nmol/h/mg = nanomole/hour/milligram protein, s.d. = standard deviation
